# Supplementary material for: How are plant and fungal communities linked to each other in belowground ecosystems? A massively parallel pyrosequencing analysis of the association specificity of root-associated fungi and their host plants
Source: PubMed Central journal article supplement (PMC3790555; doi:10.1002/ece3.706), 2013-08-02
Supplement: ece30003-3112-SD6.pdf [file ece30003-3112-SD6.pdf]

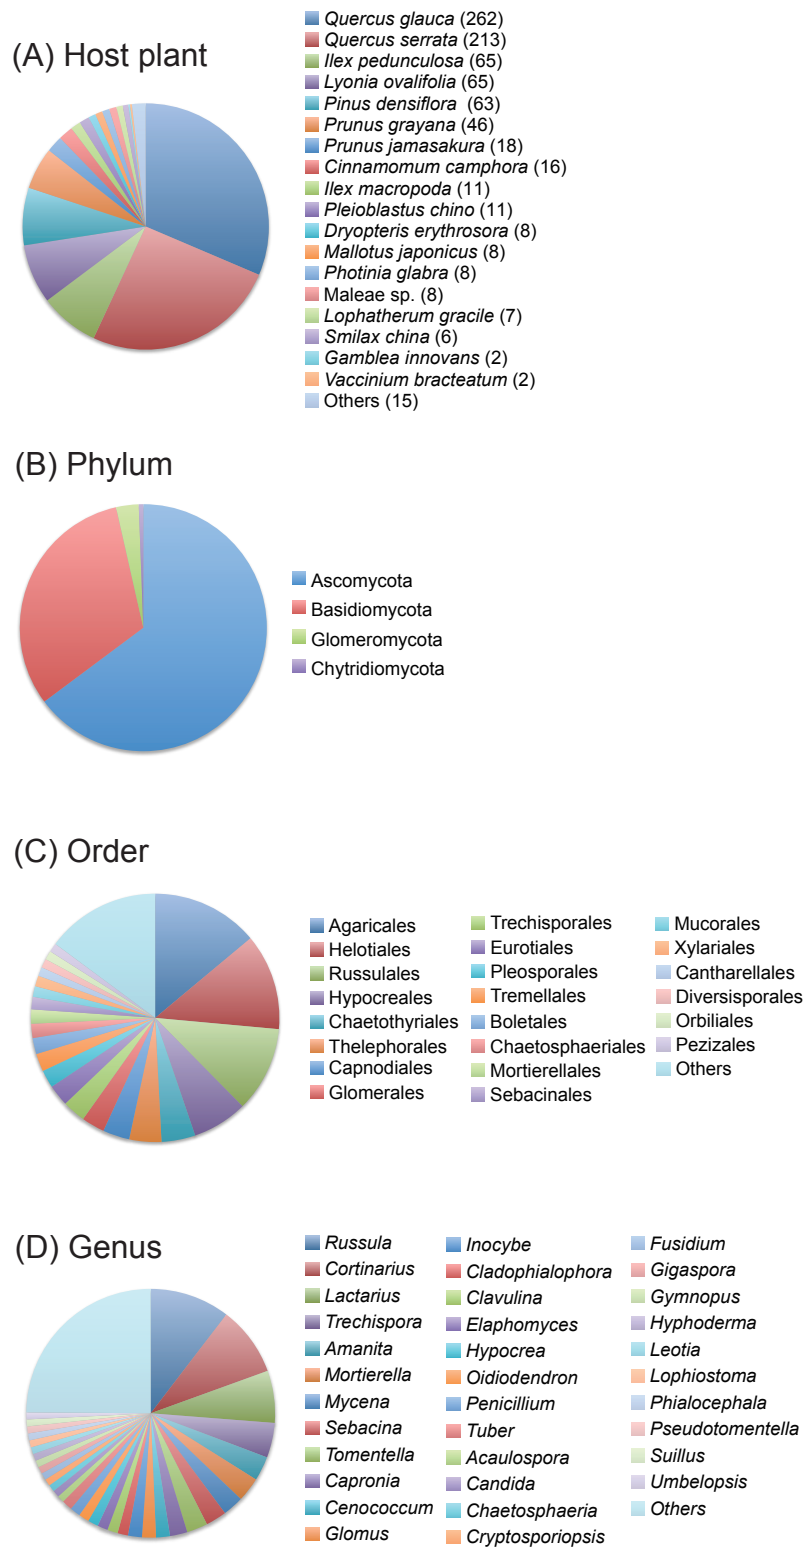

Fig. S1
